1 **Different treatment durations of loperamide in preventing pyrotinib-induced**  
2 **diarrhea: A randomized, parallel-group sub-study of the phase II PHAEDRA**  
3 **trial**

4

5 **Running title:** Prophylaxis for pyrotinib-induced diarrhea

6

7 Changjun Wang<sup>#1</sup>, Yan Lin<sup>#1</sup>, Ying Xu<sup>1</sup>, Feng Mao<sup>1</sup>, Jinghong Guan<sup>1</sup>, Xuejing Wang<sup>1</sup>,  
8 Yanna Zhang<sup>1</sup>, Xiaohui Zhang<sup>1</sup>, Songjie Shen<sup>1</sup>, Ying Zhong<sup>1</sup>, Bo Pan<sup>1</sup>, Li Peng<sup>1</sup>, Xin  
9 Huang<sup>1</sup>, Xi Cao<sup>1</sup>, Ru Yao<sup>1</sup>, Xintong Zhou<sup>1</sup>, Zecheng He<sup>1</sup>, Yuhan Liu<sup>1</sup>, Jie Lang<sup>2</sup>,  
10 Chenggang Li<sup>3</sup>, Yidong Zhou<sup>\*1</sup>, Qiang Sun<sup>\*1</sup>

11

12 <sup>1</sup> Department of Breast Surgery, Peking Union Medical College Hospital, Beijing,  
13 China

14 <sup>2</sup> Department of Breast Surgery, Beijing Longfu Hospital, Beijing, China

15 <sup>3</sup> State Key Laboratory of Medicinal Chemical Biology and College of Pharmacy,  
16 Nankai University, Tianjin, China

17

18 <sup>#</sup>These authors contributed equally to this work.

19

20 **\*Corresponding authors:**

21 Prof. Yidong Zhou, Department of Breast Surgery, Peking Union Medical College  
22 Hospital, No. 41, DaMuCang Lane, XiCheng District, Beijing 100041, China. Email:  
23 zhouyd@pumch.cn

24 Prof. Qiang Sun, Department of Breast Surgery, Peking Union Medical College  
25 Hospital, No. 41, DaMuCang Lane, XiCheng District, Beijing 100041, China. Email:  
26 sunqiangpumch@sina.com

27

28

29

30

31 **Abstract**

32 **Background:** Pyrotinib, a pan-HER tyrosine kinase inhibitor, demonstrates efficacy  
33 in the treatment of HER2-positive breast cancer. However, the frequent occurrence of  
34 treatment-emergent diarrhea necessitating discontinuation, impacts patient outcomes.

35 **Methods:** In this multicenter, open-label, phase II PHAEDRA study enrolling early  
36 stage HER2-positive patients for postoperative treatment with nab-paclitaxel and  
37 pyrotinib, 120 patients were included in a sub-study and randomly divided into two  
38 groups to receive 21 days and 42 days of loperamide for primary prophylaxis of  
39 diarrhea, followed by as-needed usage. The primary outcome was the incidence of  
40 grade  $\geq 3$  diarrhea.

41 **Results:** Fifty-eight patients in the 21-day group and 59 patients in the 42-day group  
42 received at least one dose of pyrotinib. With a median follow-up of 12.1 months, all  
43 patients experienced diarrhea of any grade, with grade  $\geq 3$  events in 39.7% of the  
44 21-day group and 42.4% of the 42-day group (relative risk: 0.94; 95% confidence  
45 interval: 0.61-1.45). The most common treatment-emergent adverse events, other than  
46 diarrhea, were hypoesthesia, vomiting, nausea, and rash, mostly grade 1-2, except for  
47 one patient with a grade  $\geq 3$  decreased neutrophil count in each group.

48 **Conclusion:** No significant differences were observed between 21-day and 42-day  
49 loperamide durations in preventing grade  $\geq 3$  diarrhea. Considering the economic cost  
50 and patient compliance, 21-day loperamide prophylaxis might represent a more  
51 pragmatic and appropriate approach for clinical application.

52 **Trial registration:** ClinicalTrials.gov, NCT04659499

53 **Keywords:** Breast cancer, tyrosine kinase inhibitor, pyrotinib, diarrhea

54

55

56

57

58

## 59 **Introduction**

60 Pyrotinib is a pan-human epidermal growth factor receptor (HER) tyrosine  
61 kinase inhibitor (TKI) targeting HER1, HER2, and HER4 independently developed in  
62 China. Since its introduction, pyrotinib has demonstrated significant survival benefits  
63 in patients with HER2-positive breast cancer. In the phase III PHENIX trial, pyrotinib  
64 in combination with capecitabine achieved a median progression-free survival (PFS)  
65 of 11.1 months for HER2-positive metastatic breast cancer, showing a risk reduction  
66 of 82% for disease progression or death compared with the control group (placebo  
67 plus capecitabine).<sup>1</sup> Similarly, in the phase III PHOEBE trial, pyrotinib combined  
68 with capecitabine obtained a median PFS of 12.5 months in HER2-positive metastatic  
69 breast cancer, reducing the risk of disease progression or death by 61% compared  
70 with lapatinib combined with capecitabine.<sup>2</sup> In the PHILA trial, pyrotinib in  
71 combination with trastuzumab and docetaxel had a median PFS of 24.3 months in the  
72 first-line treatment of HER2-positive metastatic breast cancer, demonstrating  
73 significant superiority compared to trastuzumab combined with docetaxel plus  
74 placebo (median PFS=10.4 months).<sup>3</sup> The phase III PHEDRA study on the  
75 neoadjuvant treatment of early stage HER2-positive breast cancer, revealed a  
76 significant improvement in the total pathologic complete response (tpCR) rate with  
77 the combination of pyrotinib, trastuzumab, and docetaxel beyond that of placebo,  
78 trastuzumab, and docetaxel (41% vs. 22%,  $p < 0.0001$ ).<sup>4</sup>

79 However, similar to other TKIs, diarrhea remains a significant adverse event  
80 frequently occurring during pyrotinib treatment, with an incidence rate exceeding 95%  
81 in these studies.<sup>1-4</sup> Specifically, the incidences of grade  $\geq 3$  treatment-emergent  
82 diarrhea were 30.8% and 30.5% in the PHENIX and PHOEBE studies with the  
83 treatment of pyrotinib plus capecitabine,<sup>1, 2</sup> respectively, and an even more  
84 pronounced 46.5% in the PHILA study and 44.4% in the PHEDRA study with the  
85 treatment of pyrotinib combined with trastuzumab plus docetaxel.<sup>3, 4</sup> Severe diarrhea

86 can necessitate discontinuation of pyrotinib, subsequently impacting its anti-tumor  
87 efficacy, posing a clinical safety concern that warrants attention.

88 In the CONTROL study, the cohort receiving loperamide as a primary  
89 prophylaxis for diarrhea over the initial 56 days documented a grade  $\geq 3$  diarrhea  
90 incidence rate of 31% during neratinib administration.<sup>5</sup> In contrast, the ExteNET study,  
91 which did not employ any diarrhea prophylactic strategies, reported a 40% rate of  
92 grade  $\geq 3$  diarrhea.<sup>6</sup> Consequently, the Chinese Society of Clinical Oncology (CSCO)  
93 guideline recommends the prophylactic use of loperamide starting with the first dose  
94 of neratinib, continuing for 56 days.<sup>7</sup> In the NALA study, a 21-day loperamide of  
95 primary prophylaxis similarly reduced the incidence of grade  $\geq 3$  diarrhea during  
96 combined neratinib and capecitabine therapy to 24.4%.<sup>8</sup>

97 Currently, there are no clinical studies on the prevention of pyrotinib-induced  
98 diarrhea. For patients whose pyrotinib therapy was interrupted due to diarrhea, the  
99 CSCO guidelines suggest a 21-day prophylactic treatment with loperamide upon  
100 re-initiating pyrotinib. To explore the feasibility of loperamide's primary prophylaxis  
101 for pyrotinib-induced diarrhea and to further optimize diarrhea prophylactic strategies,  
102 this study evaluated the incidence of diarrhea in patients with early stage  
103 HER2-positive breast cancer receiving albumin-bound paclitaxel combined with  
104 pyrotinib, employing both 42-day and 21-day primary prophylaxis with loperamide.

105

## 106 **Methods**

### 107 **Study design and patients**

108 This was a sub-study of the multicenter, open-label, single-arm phase II  
109 PHAEDRA study (NCT04659499) designed to investigate different prophylactic  
110 strategies for treatment-emergent diarrhea that occurred during pyrotinib treatment.  
111 The study was approved by the institutional ethics committee of Peking Union  
112 Medical College Hospital (approval number: HS-2617) and was conducted in  
113 accordance with the 2008 Declaration of Helsinki. The PHAEDRA study included

114 patients with tumors  $\leq 3$  cm, lymph node-negative (N0) or micro-metastatic (N1mi),  
115 HER2 positive breast cancer from Peking Union Medical College Hospital, Beijing  
116 Longfu Hospital, Weihai Municipal Hospital, and Weihai Maternal and Child Health  
117 Hospital in China to receive adjuvant treatment with nab-paclitaxel and pyrotinib  
118 within 90 days after tumor resection. In this sub-study, 120 patients from the main  
119 study who signed the sub-study informed consent were 1:1 randomly assigned to two  
120 groups to receive 21-days (the 21-day group) and 42-days (the 42-day group) of  
121 loperamide as primary prophylaxis for treatment-emergent diarrhea (Figure 1). The  
122 full eligibility criteria for the main study and this sub-study have been previously  
123 reported.<sup>9</sup>

124

#### 125 **Treatment procedure**

126 All patients were administered intravenous nab-paclitaxel (260 mg/m<sup>2</sup> once  
127 every 21-days cycle for 4 cycles and oral pyrotinib (400 mg) once daily for 1 year as  
128 adjuvant therapy. For primary prophylaxis of treatment-emergent diarrhea, the 21-day  
129 group additionally received loperamide during cycle 1 of adjuvant therapy at a dose of  
130 4 mg three times a day on days 1–7 and 4 mg twice a day on days 8–21; the 42-day  
131 group received loperamide during cycles 1 and 2 of adjuvant therapy at a dose of 4  
132 mg three times a day on days 1–7 and 4 mg twice a day on days 8–42. Once the  
133 primary prophylaxis was completed, loperamide was administered as needed for  
134 treatment-emergent diarrhea management during the remaining treatment duration  
135 with pyrotinib. When grade 1–2 treatment-emergent diarrhea with complications  
136 (including but not limited to abdominal cramping, grade  $\geq 2$  nausea/vomiting, fever,  
137 pyemia, decreased neutrophil count, bleeding, and dehydration) or grade 3  
138 treatment-emergent diarrhea occurs, pyrotinib treatment is interrupted and resumed  
139 until recovery to grade 0–1 without complications. Dose reduction is not required  
140 after recovery for the first time, but should be reduced to 320 mg at the next time and  
141 to 240 mg at most. If the continuous interruption time was more than 28 days, patients

142 were withdrawn from the study. When grade 4 treatment-emergent diarrhea occurs,  
143 pyrotinib is permanently discontinued. Patients were assessed at the study center  
144 every 3 weeks  $\pm 7$  days for the initial 10 weeks and subsequently every 3 months  $\pm 14$   
145 days until a full year of pyrotinib treatment was completed. Follow-up continued for  
146 28 days after the last dose of pyrotinib was given.

147

## 148 **Outcomes**

149 The primary endpoint of the sub-study was the incidence of grade  $\geq 3$   
150 treatment-emergent diarrhea from the first dose to 28 days after the last dose of the  
151 study drug.

152 The secondary endpoints of this study included the incidence and severity of  
153 treatment-emergent diarrhea during the first two cycles (42 days) of adjuvant therapy;  
154 the incidence and severity of constipation; the onset time, frequency, and duration of  
155 grade  $\geq 3$  treatment-emergent diarrhea; the relationship between treatment-emergent  
156 diarrhea and study drugs; the incidence of dose reduction, discontinuation, and  
157 hospitalization due to treatment-emergent diarrhea; all treatment-emergent adverse  
158 events (TEAEs) during the study duration; and the quality of life (QoL) questionnaire  
159 score using the Functional Assessment of Cancer Therapy-Breast (FACT-B). The  
160 severity of treatment-emergent diarrhea was graded for consistency with the National  
161 Cancer Institute Common Terminology Criteria for Adverse Events (NCI CTCAE),  
162 version 5.0, assuming that the subjects had one stool per day at baseline.

163

## 164 **Statistical analysis**

165 All the safety analyses were descriptive. Kaplan–Meier curves are shown for the  
166 percentage of subjects in each group who did not develop diarrhea of any grade, and  
167 for those who did not have diarrhea of grade  $\geq 3$ . The two groups were compared  
168 using the log-rank test. QoL analyses were carried out in all patients, including the  
169 safety population who underwent baseline and one post-baseline QoL assessment. A

170 mixed-model for repeated measures (MMRM) was used to analyze the data. The  
171 mean (standard error) of the observed scores over time was calculated. Statistical  
172 analyses were performed using R (version 4.1.2).

## 173 **Results**

### 174 **Baseline characteristics**

175       Between June 8, 2021, and November 22, 2022, 120 patients completed  
176 enrollment and randomization. Three patients did not follow the scheduled  
177 loperamide administration, and 117 patients received at least one dose of pyrotinib: 58  
178 in the 21-day group and 59 in the 42-day group. All of them were included in the  
179 sub-study analysis set and the safety analysis set. At the cut-off date on September 27,  
180 2023, two patients withdrew from the 21-day group for intolerable diarrhea and  
181 received other anti-tumor therapies for liposarcoma on the face. In the 42-day group,  
182 1 patient was lost to follow-up and 2 withdrew from the study for intolerable diarrhea  
183 and bone metastases. The baseline characteristics are summarized in Table 1. The  
184 median follow-up time was 12.1 months (interquartile range [IQR]: 9.5, 12.8).

185

### 186 **Treatment-emergent diarrhea**

187       All 117 patients developed treatment-emergent diarrhea (Table 2). At 1 year and  
188 28 days after the first dose of pyrotinib, 76 episodes of grade  $\geq 3$  treatment-emergent  
189 diarrhea occurred in 23 patients (39.7%) in the 21-day group and 96 episodes  
190 occurred in 24 patients (40.7%) in the 42-day group. The relative risk for developing  
191 grade  $\geq 3$  treatment-emergent diarrhea was 0.97 (95% confidence interval [CI]: 0.63,  
192 1.52). The median number of episodes for each patient who developed grade  $\geq 3$   
193 treatment-emergent diarrhea was 2 (IQR: 1, 5) and 1 (IQR: 1, 3) in groups A and B,  
194 respectively. The median duration per grade  $\geq 3$  treatment-emergent diarrhea episodes  
195 was 2 (IQR: 2, 2) days for the 21-day group and 2 (IQR: 2, 3) days for the 42-day  
196 group. In the 21-day group, the median cumulative duration of grade  $\geq 3$   
197 treatment-emergent diarrhea per patient, accounting for the total duration of all  
198 individual episodes, was 5 days (IQR: 2, 12). Meanwhile, the 42-day group had a  
199 median of 2.5 days (IQR: 2, 6.8). Most cases of grade  $\geq 3$  diarrhea developed in the  
200 first 3 months (Figure 2). In the 21-day group, the median time to the first occurrence



201 of grade  $\geq 3$  diarrhea was 9 days (IQR: 7, 22) after the initial dose of pyrotinib. In  
202 contrast, for the 42-day group, this event was observed at a median time of 16 days  
203 (IQR: 7.3, 75.3). In the first 42 days, 43 episodes of grade  $\geq 3$  treatment-emergent  
204 diarrhea occurred in 21 patients (36.2%) in the 21-day group with each episode lasting  
205 2 days (IQR: 2, 3), whereas 32 episodes occurred in 16 patients (27.1%) in the 42-day  
206 group, with each episode lasting 2 days (IQR: 2, 3).

207 From the Kaplan–Meier curves, 42-days loperamide prophylaxis did not reduce  
208 the proportion of patients who developed treatment-emergent diarrhea of any grade  
209 (Figure 3a) or grade  $\geq 3$  (Figure 3b).

210 One patient in both groups discontinued pyrotinib treatment for intolerant  
211 diarrhea. The proportion of patients interrupting pyrotinib treatment due to diarrhea  
212 was 3.4% in each group (Table 2). Pyrotinib was discontinued in one patient with  
213 diarrhea in the 42-day group, while there were no discontinuations in the 21-day  
214 group. Two patients in the 21-day group and one patient in the 42-day group required  
215 a dose reduction of pyrotinib due to diarrhea. Despite the high incidence of diarrhea in  
216 the first two cycles of treatment, only one patient (1.7%) in the 21-day group  
217 interrupted pyrotinib, and there was no pyrotinib discontinuation or nab-paclitaxel  
218 reduction or discontinuation, probably due to continuous administration of  
219 loperamide.

220 In the 21-day group, the incidences of treatment-related diarrhea of any grade  
221 and grade  $\geq 3$  during the combination treatment of nab-paclitaxel plus pyrotinib in the  
222 first 12 weeks were 91.4% and 34.5%, respectively, whereas those of pyrotinib  
223 alone were 94.8% and 13.8%, respectively. In the 42-day group, treatment-related  
224 diarrhea of any grade occurred in 88.1% of patients during combination treatment  
225 versus 94.9% during pyrotinib monotherapy. Furthermore, 28.8% of patients during  
226 combination treatment and 25.4% of patients during pyrotinib monotherapy  
227 experienced treatment-related diarrhea of grade  $\geq 3$ .

228

229 **Non-diarrhea TEAEs**

230 The most common TEAEs, other than diarrhea, were hypoesthesia, vomiting,  
231 nausea, and rash in both groups. The safety profile in this study was similar to that in  
232 previous reports on pyrotinib and nab-paclitaxel (Table 3). Most TEAEs were of grade  
233 1-2. However, in each group, there was one case (1.7%) of grade  $\geq 3$  neutrophil count  
234 decrease, and one case of grade  $\geq 3$  white blood cell count decrease. Only 1 patient  
235 across the groups required granulocyte colony-stimulating factor administration to  
236 manage these adverse events. In one patient, the administration of nab-paclitaxel and  
237 pyrotinib was modified with dose reductions due to hepatic function abnormalities.  
238 Four patients (6.9%) in the 21-day group and five (8.5%) in the 42-day group  
239 developed grade 1 constipation during the primary prophylaxis period, leading to a  
240 reduction of loperamide in three patients. Intestinal obstruction or more serious  
241 sequelae of constipation have not yet been reported. No serious TEAEs have been  
242 reported. No deaths occurred.

243

244 **QoL**

245 Based on the designated follow-up regimen, QoL assessment utilizing the  
246 FACT-B questionnaire was administered tri-weekly for the initial 3-month period and  
247 subsequently on a quarterly basis thereafter. FACT-B scores were analyzed using  
248 MMRM model, and the results showed that in both the 21-day group and the 42-day  
249 group, a discernible decline from baseline in FACT-B aggregate scores was observed  
250 during the preliminary two months (Figure 4). This decline was consistent with a  
251 clinically significant difference (7-8 points). However, a resurgence in scores was  
252 evident from the third month. The score trajectories of the two groups displayed  
253 marked divergence in the ninth month. Notably, only 31 questionnaires were collected  
254 in the 12<sup>th</sup> month.

255

256

257 **Discussion**

258 The ErbB receptor plays a pivotal role in the maintenance of intestinal barrier  
259 integrity. Inhibition of the epidermal growth factor receptor (EGFR) results in  
260 diminished proliferation of intestinal mucosal epithelial cells, augmented apoptosis,  
261 and heightened endoplasmic reticulum stress. This compromises the healing capacity  
262 of the intestinal epithelium, leading to mucosal atrophy and impaired intestinal  
263 absorption. Furthermore, both HER2 and EGFR are expressed on the membranes of  
264 intestinal epithelial cells. Their synergistic action modulates chloride ion secretion  
265 through the phosphoinositide 3-kinase and protein kinase C pathways. Upon  
266 inhibition of these receptors, there is an excess of chloride ions in the intestinal lumen,  
267 which reduces water absorption and predisposes the patient to aqueous diarrhea.  
268 Additional mechanisms contributing to TKI-induced diarrhea include inflammatory  
269 responses,<sup>10</sup> aberrant bile acid secretion,<sup>11</sup> and dysbiosis of the intestinal microbiota.  
270 Given these mechanisms, diarrhea is inevitable and is one of the most frequent and  
271 significant TEAEs during TKIs treatment.

272 The incidence of diarrhea varies among TKIs. For lapatinib, the probability of  
273 diarrhea ranges from 45% to 79.7%, with grade 3 or higher diarrhea occurring in 6%  
274 to 20.7% of cases.<sup>12-14</sup> In contrast, the incidence of diarrhea during neratinib treatment  
275 reaches up to 95.3%, with grade 3 or higher observed in 40% of cases.<sup>6</sup> Pyrotinib has  
276 a diarrhea incidence rate similar to neratinib, ranging between 94.8% and 98.4%, with  
277 approximately 31% of these cases being grade 3 or above.<sup>1, 2</sup> Thus, the CSCO  
278 guideline, referencing the CONTROL study which investigated prophylaxis strategies  
279 for neratinib-induced diarrhea, recommends that for patients who discontinued  
280 pyrotinib due to diarrhea, a 21-day prophylactic treatment with loperamide should be  
281 administered once pyrotinib re-initiates. As grade 3 diarrhea predominantly occurs  
282 during the first cycle of pyrotinib administration,<sup>2, 15</sup> it is hypothesized that using  
283 loperamide as primary prophylaxis during the initial 21 days might mitigate the onset  
284 of pyrotinib-induced diarrhea. Nonetheless, a notable incidence of grade 3 diarrhea

285 was still observed during the second cycle.<sup>2</sup> In the PHEDRA study, prophylactic  
286 diarrhea management with loperamide reduced the incidence of grade 3 diarrhea to  
287 36.1% (26/72) compared with 50.0% (53/106) in those without such management.  
288 Specifically, there was a 15.1% reduction during the first cycle (29.2% vs. 44.3%) and  
289 an 11.7% reduction in the second cycle (10.1% vs. 21.8%).<sup>4</sup> In this context, our study  
290 explored two regimens of loperamide: a 21-day and a 42-day course, initiated  
291 concurrently with the first dose of pyrotinib, as primary prophylaxis for diarrhea. The  
292 results indicated no significant differences between the 21-day and 42-day  
293 prophylaxis regimens in terms of overall diarrhea incidence (100% vs.100%) or the  
294 occurrence of grade 3 or higher diarrhea (39.7% vs. 42.4%). Achieving a balance  
295 between constipation and diarrhea has been a clinical challenge when using  
296 loperamide to manage TKI-induced diarrhea. However, in this study, the incidence of  
297 constipation remained low for both the 21-day (6.9%) and 42-day (8.5%) loperamide  
298 regimens, with a severity of only grade 1.

299 Severe diarrheal symptoms can prompt dose reduction or discontinuation of  
300 pyrotinib, which may potentially affect therapeutic outcomes. In the PHOEBE study,  
301 one patient (1%) discontinued pyrotinib due to diarrhea.<sup>2</sup> Meanwhile, in another phase  
302 II study, diarrhea did not result in pyrotinib discontinuation, but it did lead to dose  
303 reductions in two patients (3%).<sup>15</sup> In the present study, both the 21-day and 42-day  
304 loperamide groups had only one patient (1.7%) who discontinued treatment. In each  
305 group, two patients (3.4%) interrupted pyrotinib, while dose reductions were observed  
306 in two patients (3.4%) in the 21-day group and one case (1.7%) in the 42-day group.

307 Frequent episodes of diarrhea can compromise a patient's quality of life and  
308 affect medication adherence. In the current study, there was a decline in the patients'  
309 FACT-B scores during the initial two months. This decrease is potentially attributable  
310 to the early onset of diarrhea, commonly observed with the concurrent administration  
311 of nab-paclitaxel and pyrotinib during the early stages of treatment. As the treatment  
312 proceeded, the quality-of-life scores gradually improved.

313 In this study, a combination of pyrotinib and nab-paclitaxel was used as an  
314 anti-tumor therapeutic regimen. These TEAEs were consistent with previously  
315 reported profiles associated with both pyrotinib and albumin-bound paclitaxel. Given  
316 that nab-paclitaxel can also induce diarrhea, the frequency of diarrhea in this study,  
317 when co-administered with pyrotinib and nab-paclitaxel, was elevated compared to  
318 that in previous studies combining pyrotinib with capecitabine. The lower incidence  
319 of neutropenia compared with that reported in previous study involving nab-paclitaxel  
320 (34%), probably due to the fact that the breast cancer patients in that study were all in  
321 advanced stages with poorer overall health conditions, resulted in fewer use of  
322 leukocyte-raising agents. Notably, the hematological toxicity observed with the  
323 combination of nab-paclitaxel and anti-HER2 TKI in our study was lower than that  
324 observed with paclitaxel combined with an anti-HER2 antibody in the APT trial.

325 This study has several limitations. First, as the main study has currently  
326 completed patient enrollment, but is still ongoing, the data are not yet mature;  
327 therefore, there is a lack of patients who have not received prophylactic treatment for  
328 diarrhea to serve as a control group. Second, although the study incorporated  
329 randomization for group allocation, blinding was not employed. Finally, in the later  
330 stages of follow-up, numerous patients did not submit their quality-of-life  
331 questionnaires, rendering this portion of the scoring potentially imprecise.

332 In conclusion, no significant differences were observed between 21-day and  
333 42-day loperamide durations in preventing grade  $\geq 3$  diarrhea. Considering the  
334 economic cost and patient compliance, 21-day loperamide prophylaxis might  
335 represent a more pragmatic and appropriate approach for clinical application.

### 336 **Acknowledgments**

337 We would like to acknowledge the patients and their families, the study investigators,  
338 and the clinical site staff. We thank Xiaoyue Wu (Department of Medical Affairs,  
339 Jiangsu Hengrui Pharmaceuticals Co., Ltd.) for her input in study design and data  
340 interpretation, Yitao Wang (Department of Medical Affairs, Jiangsu Hengrui

341 Pharmaceuticals Co., Ltd.) for statistical support, and Yilan Wu (Department of  
342 Medical Affairs, Jiangsu Hengrui Pharmaceuticals Co., Ltd.) for medical writing  
343 assistance.

344

#### 345 **Ethics approval and consent to participate**

346 The study was approved by the institutional ethics committee at the Peking Union  
347 Medical College Hospital (approval number: HS-2617) with informed consent  
348 obtained from all patients in accordance with the Declaration of Helsinki. This trial  
349 was registered at ClinicalTrials.gov, number NCT04659499.

350

#### 351 **Consent for publication**

352 Not applicable.

353

#### 354 **Availability of data and materials**

355 The raw clinical data were protected and not available owing to data privacy laws.  
356 The de-identified datasets supporting the findings of this study are available for  
357 academic purposes on request from the corresponding author, Qiang Sun  
358 (sunqiangpumch@sina.com), for five years, with the approval of the Institutional  
359 Ethical Committees.

360

#### 361 **Competing interest**

362 The authors have no competing interest to declare.

363

#### 364 **Funding**

365 The study drugs pyrotinib and nab-paclitaxel were provided by Jiangsu Hengrui  
366 Pharmaceuticals Co., Ltd. This study was funded by the National High-Level Hospital  
367 Clinical Research Funding (No. 2022-PUMCH-B-038 and No. 2022-PUMCH-C-066)  
368 and TSC China Allicace (#LAM001-202205).

369

### 370 **Author contributions**

371 We had full access to all data in the trial and took responsibility for the integrity of the  
372 data and accuracy of the data analysis. Y.D.Z. and Q.S. contributed to the  
373 conceptualization and design of the trial. C.J.W., Y.L., Y.X., F.M., J.H.G, X.J.W.,  
374 Y.N.Z, X.H.Z., S.J.S., Y.Z., B.P., L.P., X.H., X.C., R.Y., X.T.Z, Z.C.H., Y.H.L, C.G.L.,  
375 J.L. collected and assembled the data. C.J.W. and Y.L. performed the statistical  
376 analyses and wrote the manuscript. All the authors participated in writing the paper  
377 and approved the final version of the manuscript.

378

### 379 **References**

- 380 1 Yan M, Bian L, Hu X et al. Pyrotinib plus capecitabine for human epidermal  
381 factor receptor 2-positive metastatic breast cancer after trastuzumab and  
382 taxanes (PHENIX): a randomized, double-blind, placebo-controlled phase 3  
383 study. *Translational Breast Cancer Research* 2020; 1: 13.
- 384 2 Xu B, Yan M, Ma F et al. Pyrotinib plus capecitabine versus lapatinib plus  
385 capecitabine for the treatment of HER2-positive metastatic breast cancer  
386 (PHOEBE): a multicentre, open-label, randomised, controlled, phase 3 trial.  
387 *Lancet Oncol* 2021; 22 (3): 351-360.
- 388 3 Xu B, Yan M, Ma F et al. LBA19 Pyrotinib or placebo in combination with  
389 trastuzumab and docetaxel for HER2-positive metastatic breast cancer  
390 (PHILA): A randomized phase III trial. *Annals of Oncology* 2022; 33: S1387.
- 391 4 Wu J, Jiang Z, Liu Z et al. Neoadjuvant pyrotinib, trastuzumab, and docetaxel  
392 for HER2-positive breast cancer (PHEDRA): a double-blind, randomized  
393 phase 3 trial. *BMC medicine* 2022; 20 (1): 498.
- 394 5 Barcenas CH, Hurvitz SA, Di Palma JA et al. Improved tolerability of  
395 neratinib in patients with HER2-positive early-stage breast cancer: the  
396 CONTROL trial. *Ann Oncol* 2020; 31 (9): 1223-1230.
- 397 6 Martin M, Holmes FA, Ejlertsen B et al. Neratinib after trastuzumab-based  
398 adjuvant therapy in HER2-positive breast cancer (ExteNET): 5-year analysis  
399 of a randomised, double-blind, placebo-controlled, phase 3 trial. *Lancet Oncol*  
400 2017; 18 (12): 1688-1700.
- 401 7 Biyun wang, Rui Ge, Jiang Z. Expert consensus on the management of  
402 adverse events of ErbB family tyrosine kinase inhibitors in breast cancer.  
403 *Zhonghua Zhong Liu Za Zhi* 2020; 42 (10): 798-806.
- 404 8 Saura C, Oliveira M, Feng Y-H et al. Neratinib Plus Capecitabine Versus  
405 Lapatinib Plus Capecitabine in HER2-Positive Metastatic Breast Cancer

- 406 Previously Treated With  $\geq 2$  HER2-Directed Regimens: Phase III NALA  
407 Trial. *J Clin Oncol* 2020; 38 (27): 3138-3149.
- 408 9 Wang C, Zhou Y, Lin Y et al. Rationale and design of a phase II trial of  
409 pyrotinib in combination with nab-paclitaxel as adjuvant therapy for N0/N1mi,  
410 HER2 $\square$ + $\square$ early breast cancer (PHAEDRA). *BMC Cancer* 2022; 22 (1): 269.
- 411 10 Hong S, Gu Y, Gao Z et al. EGFR inhibitor-driven endoplasmic reticulum  
412 stress-mediated injury on intestinal epithelial cells. *Life Sci* 2014; 119 (1-2):  
413 28-33.
- 414 11 Saran C, Sundqvist L, Ho H et al. Novel Bile Acid-Dependent Mechanisms of  
415 Hepatotoxicity Associated with Tyrosine Kinase Inhibitors. *J Pharmacol Exp*  
416 *Ther* 2022; 380 (2): 114-125.
- 417 12 Geyer CE, Forster J, Lindquist D et al. Lapatinib plus capecitabine for  
418 HER2-positive advanced breast cancer. *N Engl J Med* 2006; 355 (26):  
419 2733-2743.
- 420 13 Pivot X, Manikhas A, Żurawski B et al. CEREBEL (EGF111438): A Phase III,  
421 Randomized, Open-Label Study of Lapatinib Plus Capecitabine Versus  
422 Trastuzumab Plus Capecitabine in Patients With Human Epidermal Growth  
423 Factor Receptor 2-Positive Metastatic Breast Cancer. *Journal of Clinical*  
424 *Oncology : Official Journal of the American Society of Clinical Oncology*  
425 2015; 33 (14): 1564-1573.
- 426 14 Diéras V, Miles D, Verma S et al. Trastuzumab emtansine versus capecitabine  
427 plus lapatinib in patients with previously treated HER2-positive advanced  
428 breast cancer (EMILIA): a descriptive analysis of final overall survival results  
429 from a randomised, open-label, phase 3 trial. *Lancet Oncol* 2017; 18 (6):  
430 732-742.
- 431 15 Ma F, Ouyang Q, Li W et al. Pyrotinib or Lapatinib Combined With  
432 Capecitabine in HER2-Positive Metastatic Breast Cancer With Prior Taxanes,  
433 Anthracyclines, and/or Trastuzumab: A Randomized, Phase II Study. *J Clin*  
434 *Oncol* 2019; 37 (29): 2610-2619.

435

436



437 **Figure legends**

438 **Figure 1.** Patient flow.

439 **Figure 2.** Incidence of diarrhea of any grade (a) or grade  $\geq 3$  (b) by month.

440 **Figure 3.** Percentage of patients who did not develop a diarrhea of any grade (a) or  
441 grade  $\geq 3$  (b) after pyrotinib administration.

442 **Figure 4.** Mean change from baseline in Functional Assessment of Cancer Therapy  
443 (Breast) total scores.

444

445 **Table 1. Baseline characteristics**

| <b>Characteristics</b>                | <b>21-day<br/>loperamide<br/>(N=58)</b> | <b>42-day<br/>loperamide<br/>(N=59)</b> |
|---------------------------------------|-----------------------------------------|-----------------------------------------|
| <b>Age (years), median (IQR)</b>      | 50 (27, 72)                             | 52 (29, 68)                             |
| <b>Female, n (%)</b>                  | 58 (100)                                | 59 (100)                                |
| <b>ECOG performance status, n (%)</b> |                                         |                                         |
| 0                                     | 29 (50.0)                               | 37 (62.7)                               |
| 1                                     | 29 (50.0)                               | 22 (37.3)                               |
| <b>Hormone receptor status, n (%)</b> |                                         |                                         |
| ER+ and/or PR+                        | 40 (69.0)                               | 33 (55.9)                               |
| ER- and PR-                           | 18 (31.0)                               | 26 (44.1)                               |
| <b>Stage, n (%)</b>                   |                                         |                                         |
| IA                                    | 49 (84.5)                               | 47 (79.7)                               |
| IB                                    | 3 (5.2)                                 | 1 (1.7)                                 |
| IIA                                   | 6 (10.3)                                | 11 (18.6)                               |
| <b>Menopausal, n (%)</b>              | 25 (43.1)                               | 30 (50.8)                               |

446 IQR, interquartile range; ECOG, Eastern Cooperative Oncology Group; ER, estrogen  
447 receptor; PR, progesterone receptor.

448

449

450 **Table 2. Characteristics of treatment-emergent diarrhea**

| Characteristics                                       | 21-day               | 42-day               |
|-------------------------------------------------------|----------------------|----------------------|
|                                                       | loperamide<br>(N=58) | loperamide<br>(N=59) |
| <b>Treatment-emergent diarrhea incidence, n (%)</b>   |                      |                      |
| Any grade                                             | 58 (100)             | 59 (100)             |
| Grade $\geq$ 3                                        | 23 (39.7)            | 24 (40.7)            |
| <b>Other grade <math>\geq</math>3 diarrhea events</b> |                      |                      |
| Median episodes/patient (IQR)                         | 2 (1, 5)             | 1 (1, 3)             |
| Median duration of episode, days (IQR)                | 2 (2, 2)             | 2 (2, 3)             |
| Median time to first episode, days (IQR)              | 9 (7, 22)            | 16 (7.3, 75.3)       |
| Median cumulative duration, days (IQR)                | 5 (2, 12)            | 2.5 (2, 6.8)         |
| <b>Treatment-emergent diarrhea leading to</b>         |                      |                      |
| <b>Pyrotinib, n (%)</b>                               |                      |                      |
| Dose interruption                                     | 2 (3.4)              | 2 (3.4)              |
| Dose reduction                                        | 2 (3.4)              | 1 (1.7)              |
| Treatment discontinuation                             | 0                    | 1 (1.7)              |
| <b>Nab-paclitaxel, n (%)</b>                          |                      |                      |
| Dose interruption                                     | 0                    | 0                    |
| Dose reduction                                        | 0                    | 0                    |
| Treatment discontinuation                             | 0                    | 0                    |

451 IQR, interquartile range.

452

453 **Table 3. Treatment-emergent non-diarrhea adverse events with an incidence**  
 454 **of >10%**

| Adverse events, n (%)       | 21-day loperamide (N=58) |          | 42-day loperamide (N=59) |          |
|-----------------------------|--------------------------|----------|--------------------------|----------|
|                             | Any grade                | Grade≥ 3 | Any grade                | Grade≥ 3 |
| <b>Hypoesthesia</b>         | 36 (62.1)                | 0        | 37 (62.7)                | 0        |
| <b>Vomiting</b>             | 37 (63.8)                | 0        | 33 (55.9)                | 0        |
| <b>Nausea</b>               | 30 (51.7)                | 0        | 35 (59.3)                | 0        |
| <b>Rash</b>                 | 31 (53.4)                | 0        | 33 (55.9)                | 0        |
| <b>Pain</b>                 | 23 (39.7)                | 0        | 29 (49.2)                | 0        |
| <b>Fatigue</b>              | 17 (29.3)                | 0        | 21 (35.6)                | 0        |
| <b>Limb pain</b>            | 16 (27.6)                | 0        | 22 (37.3)                | 0        |
| <b>Fever</b>                | 16 (27.6)                | 0        | 15 (25.4)                | 0        |
| <b>Arthralgia</b>           | 15 (25.9)                | 0        | 16 (27.1)                | 0        |
| <b>Abdominal pain</b>       | 14 (24.1)                | 0        | 15 (27.1)                | 0        |
| <b>Oral ulceration</b>      | 10 (17.2)                | 0        | 12 (20.3)                | 0        |
| <b>Dizziness</b>            | 6 (10.3)                 | 0        | 16 (27.1)                | 0        |
| <b>Bone pain</b>            | 12 (20.7)                | 0        | 8 (13.6)                 | 0        |
| <b>Palmar-plantar</b>       |                          |          |                          |          |
| <b>Erythrodysaesthesia</b>  | 7 (12.1)                 | 0        | 8 (13.6)                 | 0        |
| <b>syndrome</b>             |                          |          |                          |          |
| <b>Abdominal discomfort</b> | 7 (12.1)                 | 0        | 4 (6.8)                  | 0        |
| <b>Neutrophil count</b>     |                          |          |                          |          |
| <b>decreased</b>            | 8 (13.8)                 | 1 (1.7%) | 3 (5.1)                  | 1 (1.7%) |

455

Figure 1

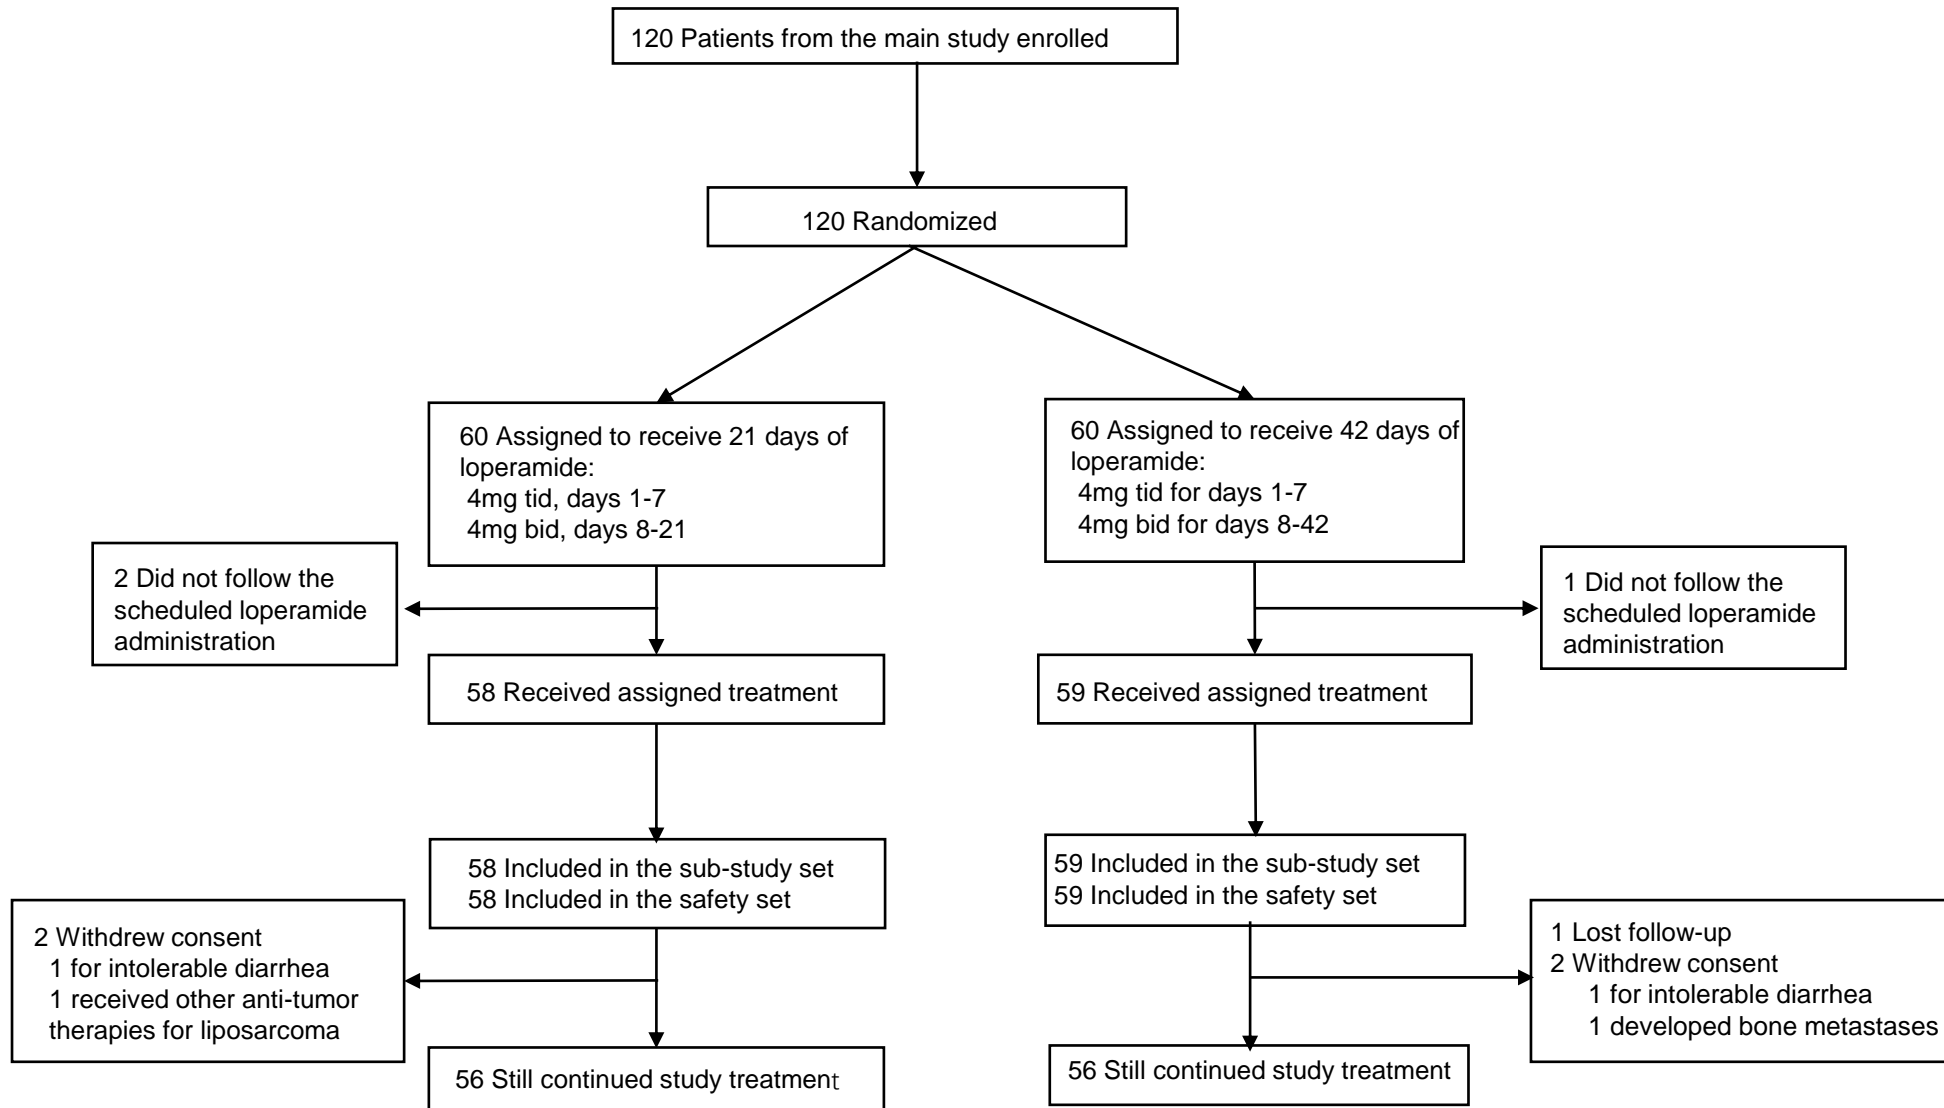

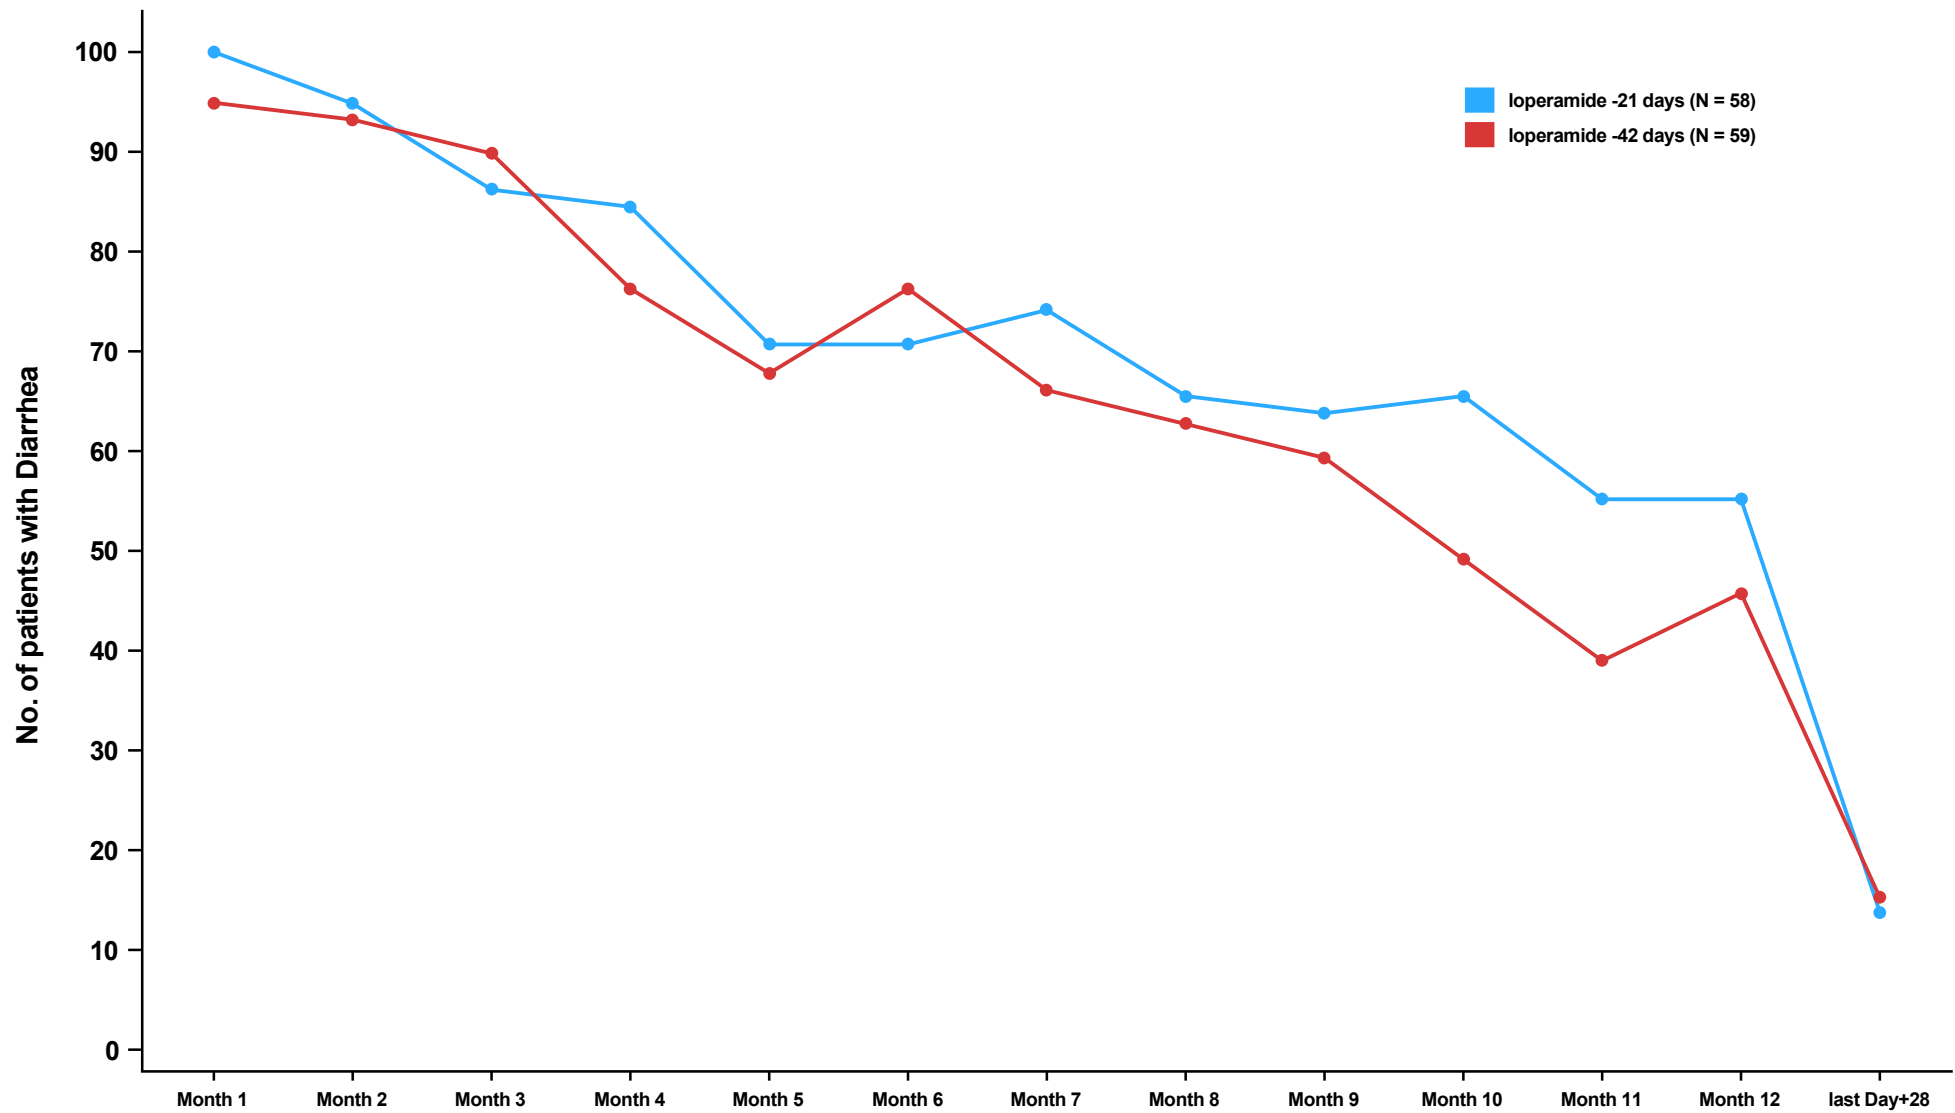

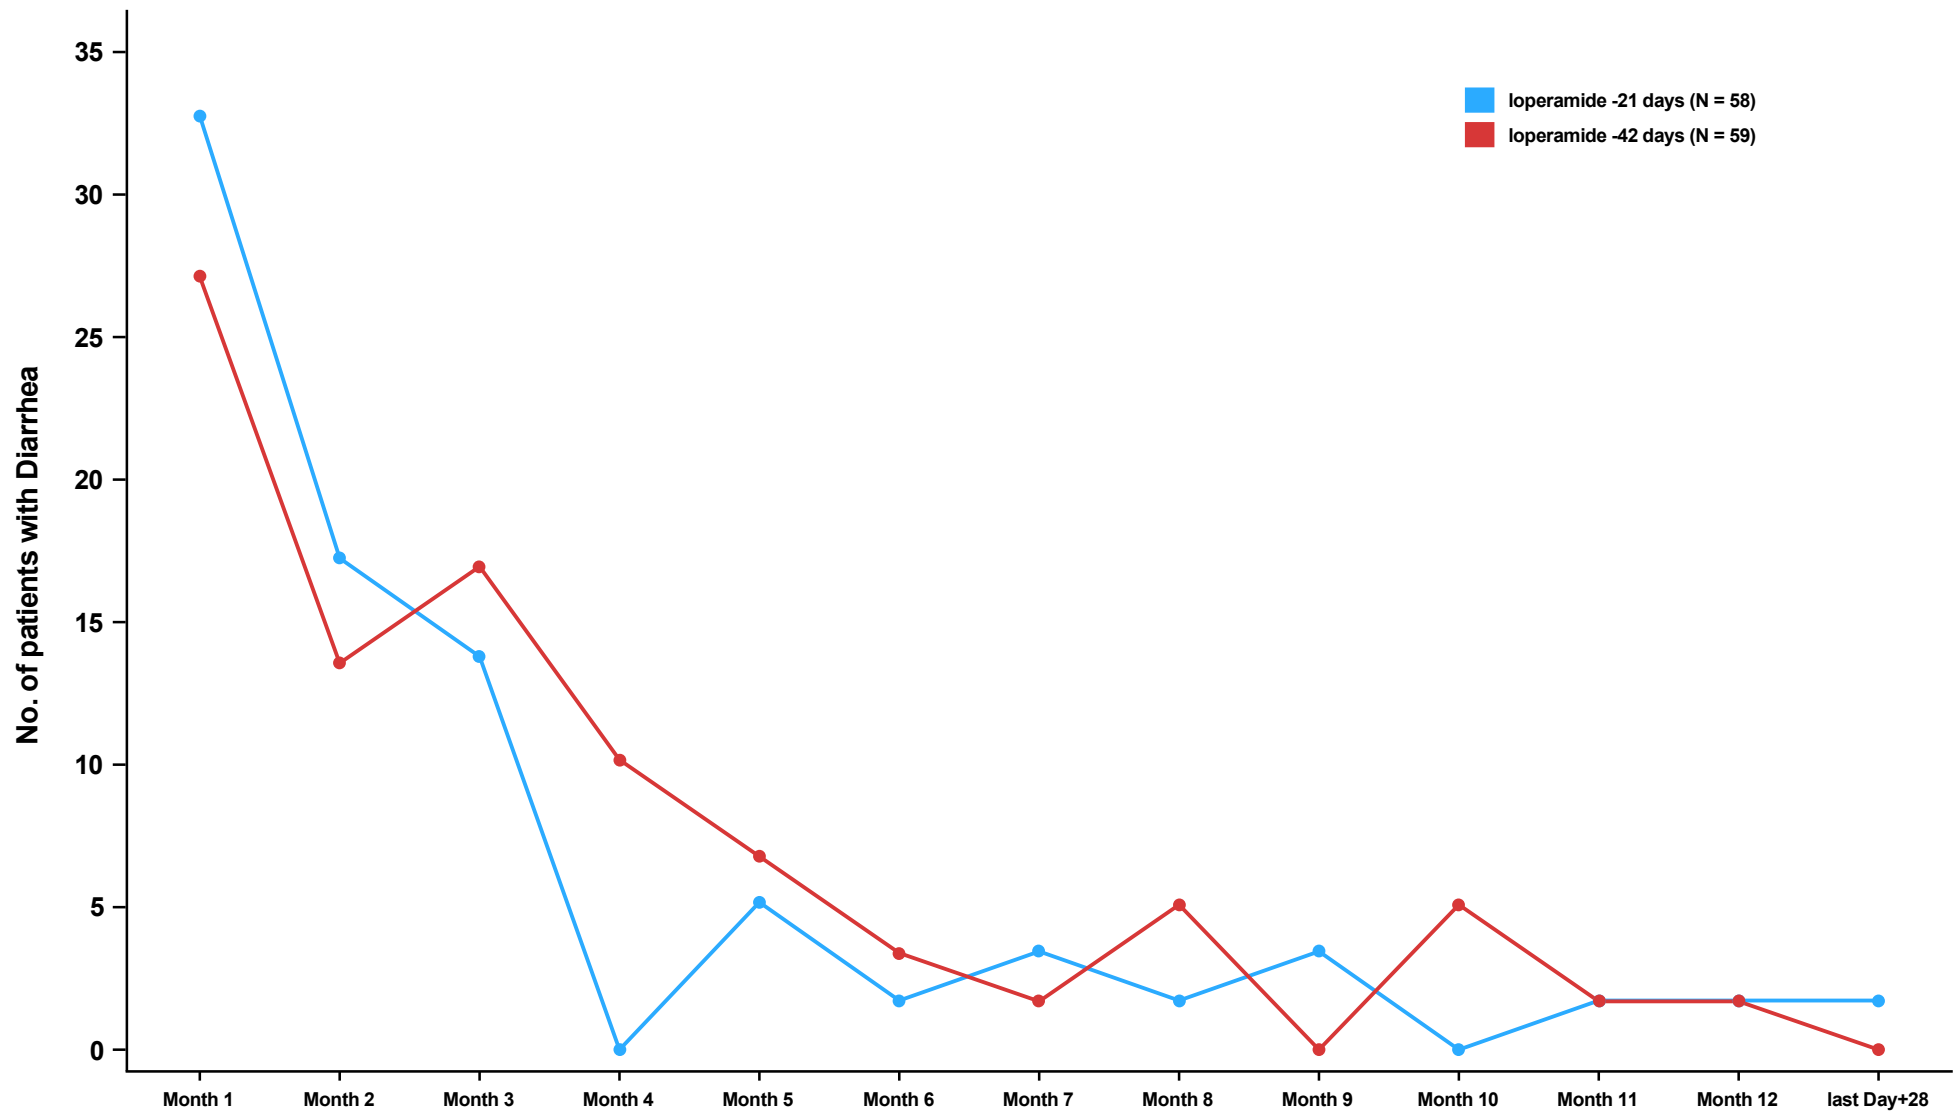

# Figure 3

a

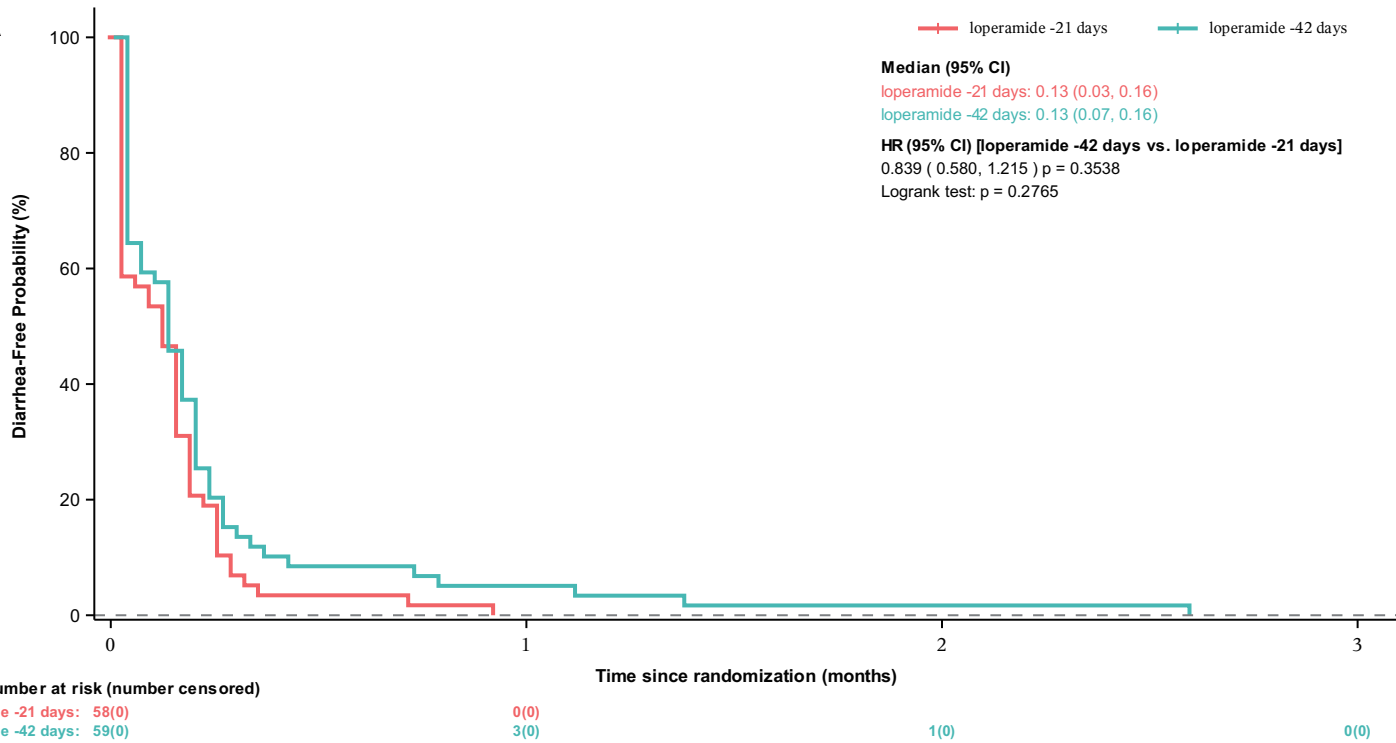

b

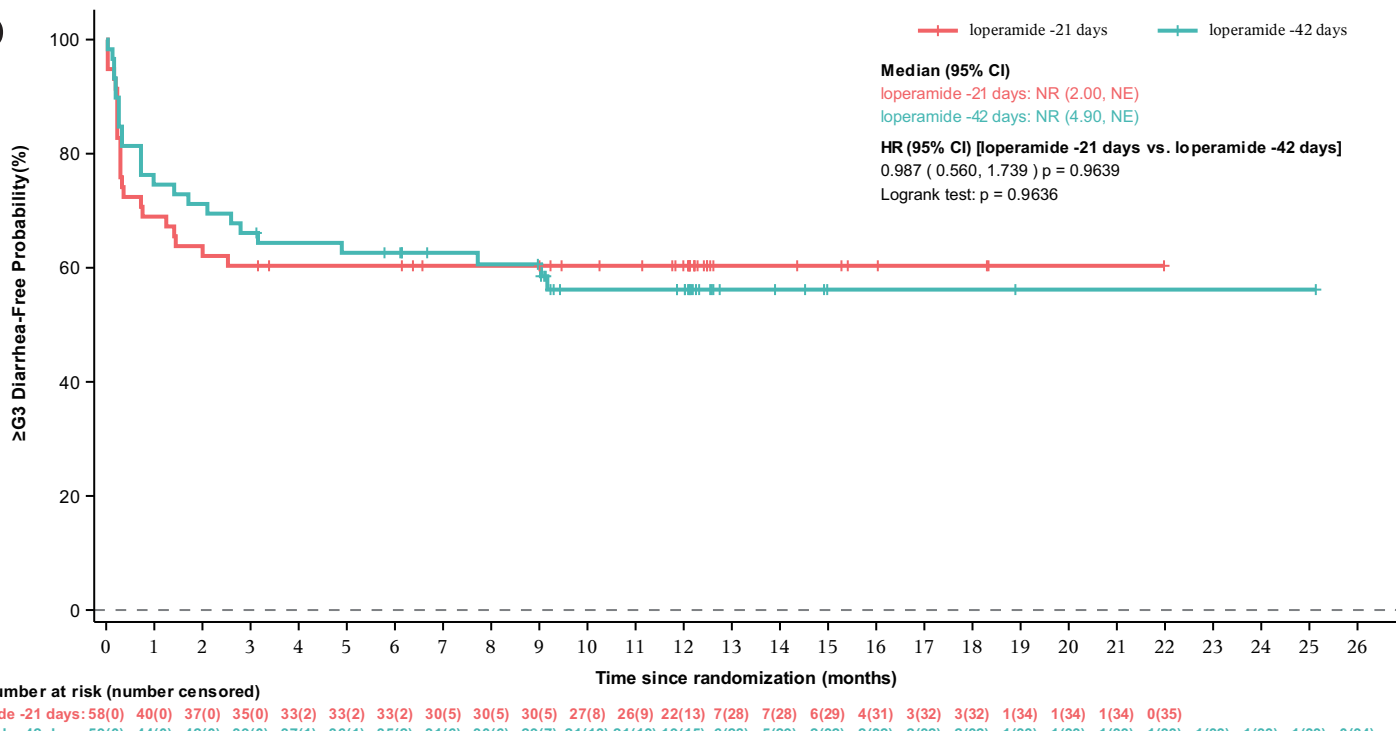



Least-squares mean change from baseline in FACT-B aggregate scores

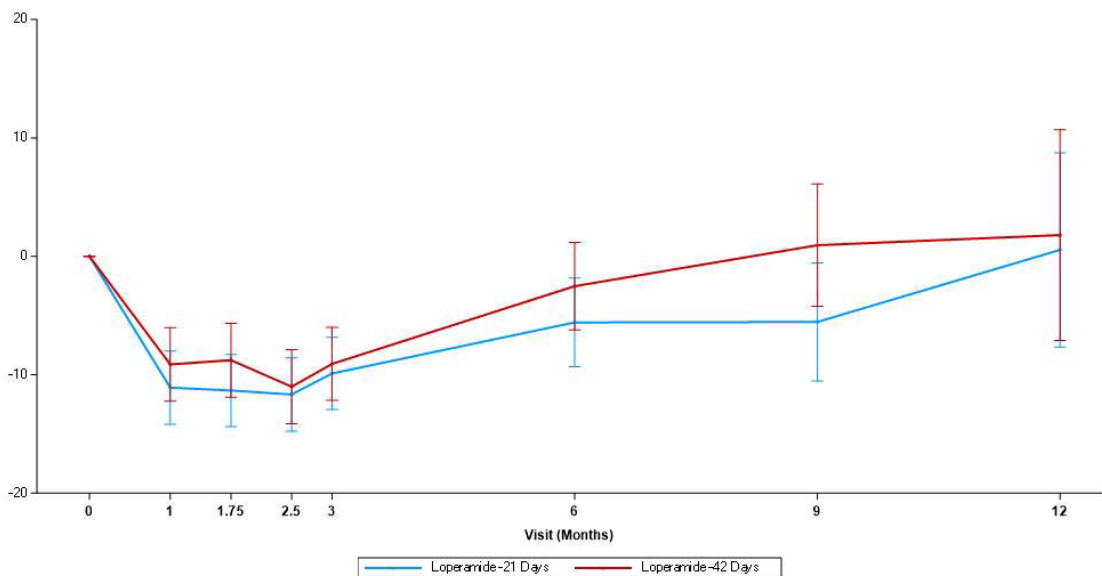

Source: https://medrxiv.org/content/10.1101/2024.08.19.24311958v2.full.pdf
